# Supplementary material for: The role of M1 to M2 macrophage polarization in the etiology of idiopathic gastroparesis: GWAS perspective
Source: bioRxiv or medRxiv preprint supplement (doi:10.1101/2022.06.22.22276605), 2022-06-23
Supplement: Supplementary file [file media-1.pdf]

# Supplementary Material

Smieszek et al., 2022

Figure 1A and 1B

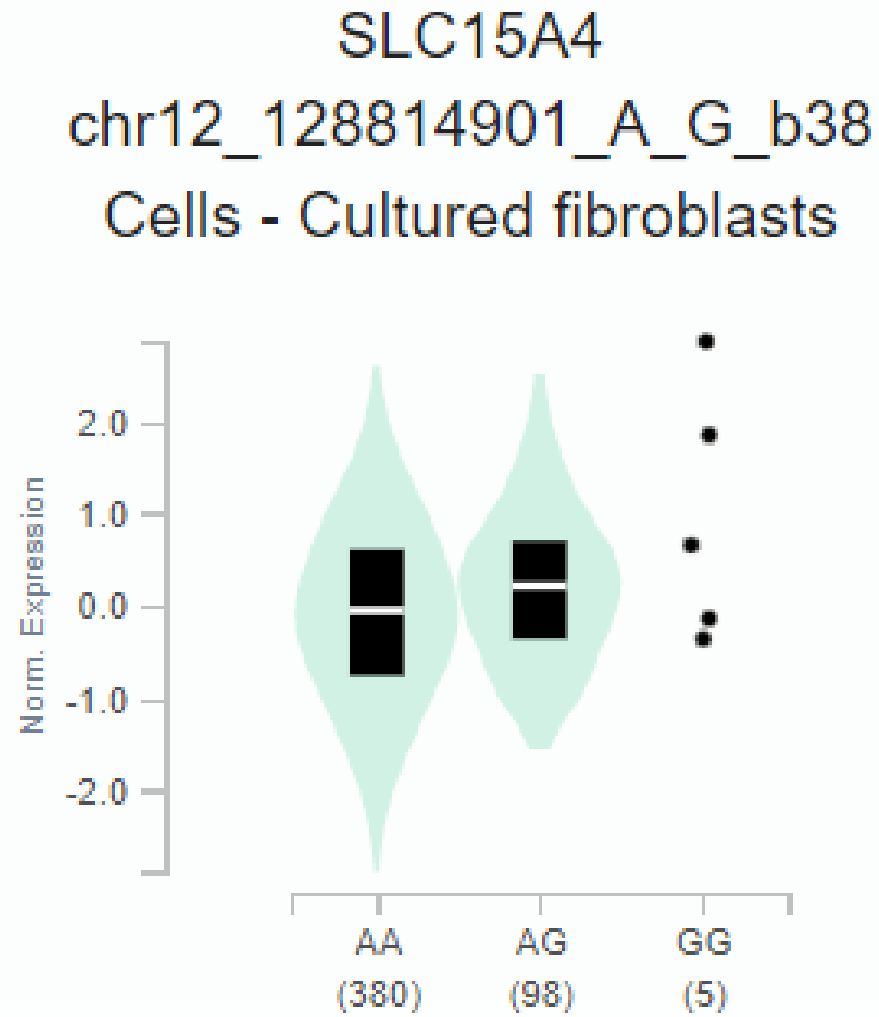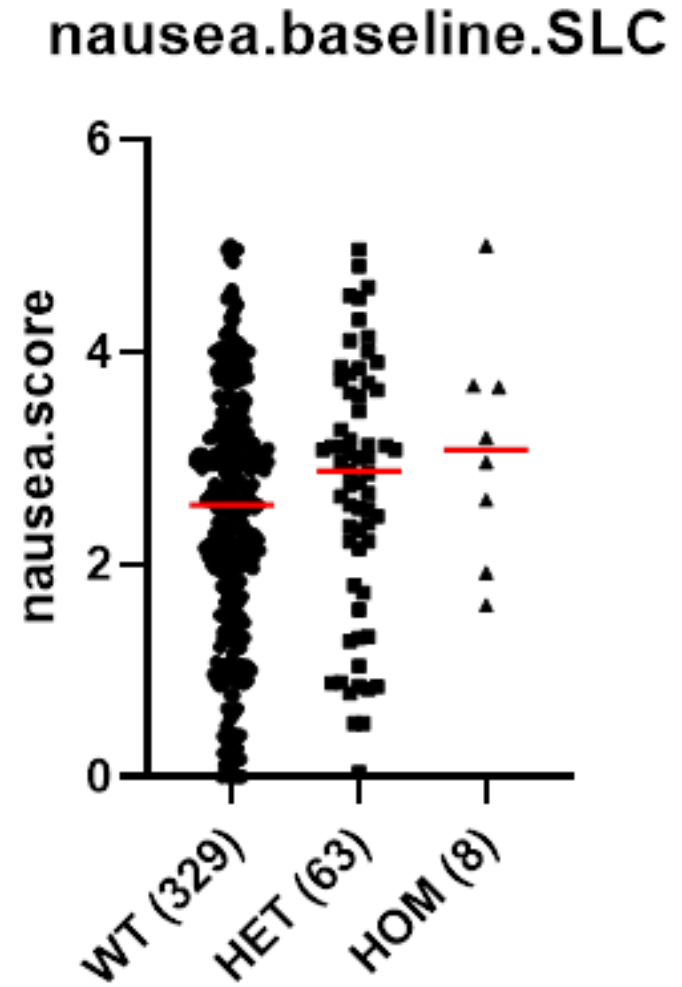

# Figure 2A and 2B: Genetic risk score

- Polygenic scores were constructed for diabetes by summing the number of risk alleles carried by each individual, weighted by the effect size estimates from well-established genome-wide significant associations derived from Li et al., (60 SNPs)
- We differentiate idiopathic from diabetic gastroparesis with a diabetes genetic risk score, - result that is statistically significant ( $p\text{-value} < 0.0004$ ).
- We also recapitulate a number of known significant loci implicated in diabetes risk including (HLA-DQB1, HLA-DQA2, EXOC6B) in the idiopathic versus diabetic gastroparesis analysis.

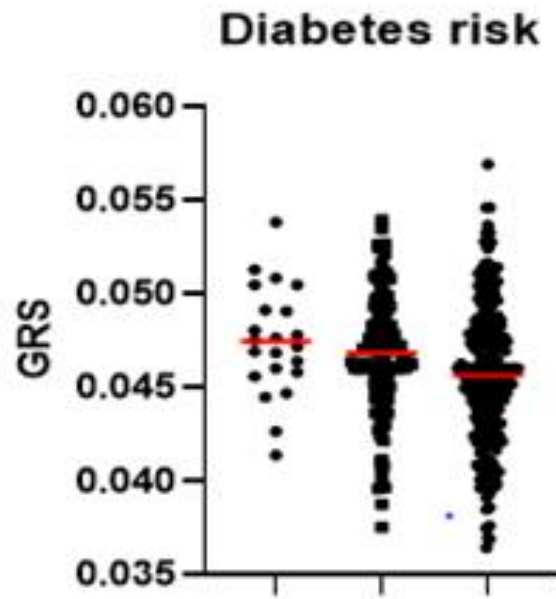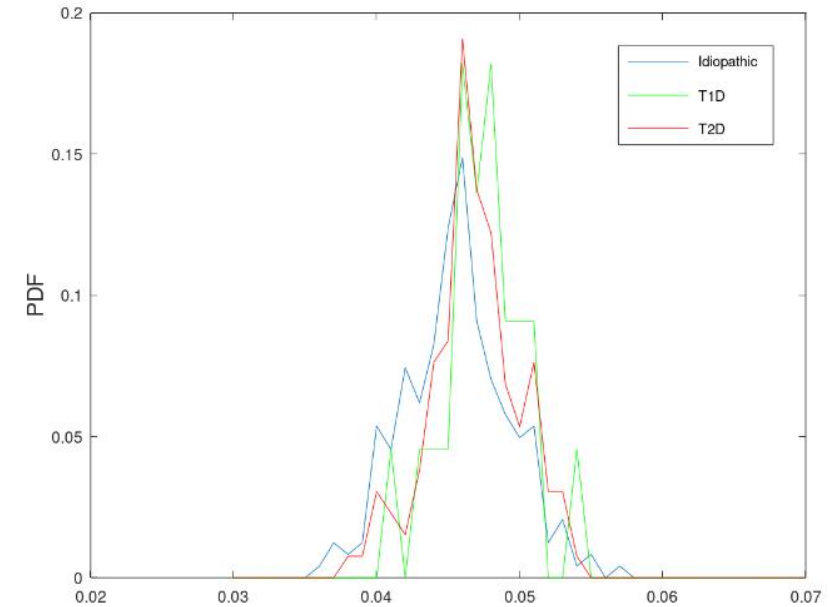

# SLC15A4 ns variant **rs33990080**

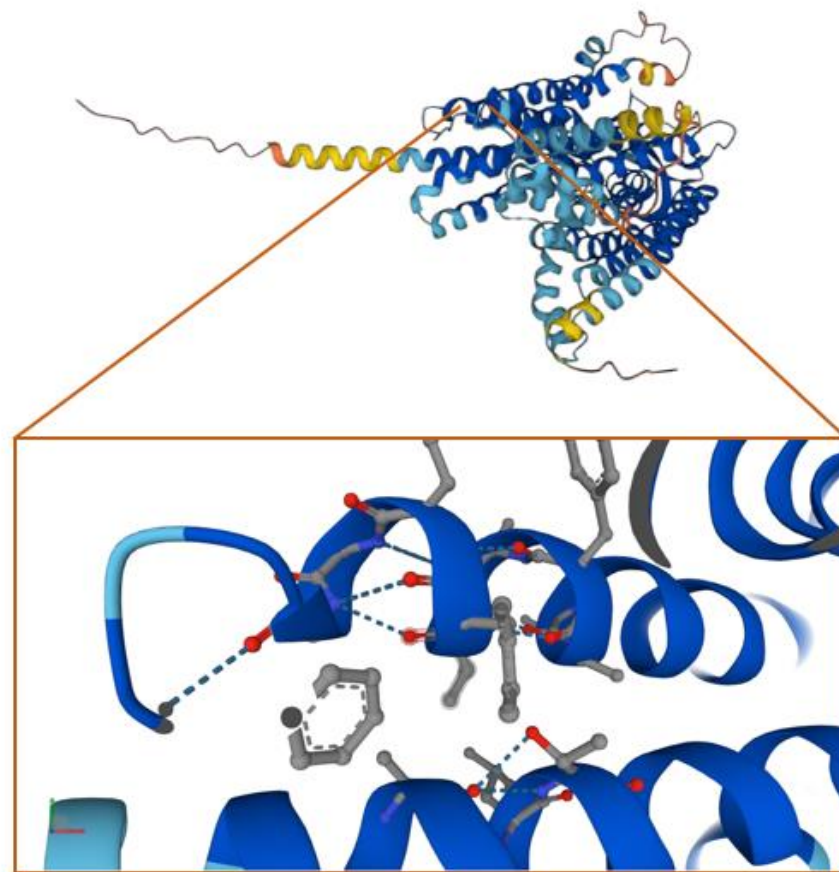

# Functional Dyspepsia GWAS - Garcia-Etxebarria et al., - 2021

| chr | bp        | rsID        | Nearestgene | effect.allele | OR   | P.logistic    | MAF.gastro.all | MAF.non-gastro | MAF.diabetic | MAF.idiopathic | Mappedgenes                                      |
|-----|-----------|-------------|-------------|---------------|------|---------------|----------------|----------------|--------------|----------------|--------------------------------------------------|
| 1   | 204977799 | rs2595968   | NFASC       | A             | 0.74 | <b>0.0045</b> | 0.240          | 0.299          | 0.229        | 0.245          | NFASC, CNTN2, TMEM81, CDK18, MDM4, LRRN2         |
| 2   | 223923219 | rs6719560   | KCNE4       | T             | 1.13 | 0.3645        | 0.129          | 0.115          | 0.138        | 0.124          | KCNE4, FARSB, PAX3, CCDC140, MOGAT1, SCG2, AP1S3 |
| 3   | 22296260  | rs144885331 | ZNF385D     | C             | 0.97 | 0.8946        | 0.033          | 0.034          | 0.024        | 0.037          | ZNF385D                                          |
| 3   | 131682621 | rs9868674   | CPNE4       | T             | 1.09 | 0.3625        | 0.436          | 0.415          | 0.467        | 0.421          | CPNE4, ASTE1, NEK11, MRPL3                       |
| 3   | 172649336 | rs80062354  | SPATA16     | T             | 1.07 | 0.5601        | 0.205          | 0.195          | 0.181        | 0.217          | SPATA16, NLGN1, NAALADL2                         |
| 5   | 2703856   | rs961136    | IRX2        | T             | 0.65 | 0.3066        | 0.011          | 0.017          | 0.010        | 0.012          | ADAMTS16                                         |
| 6   | 128345371 | rs17245411  | PTPRK       | C             | 1.07 | 0.7672        | 0.049          | 0.046          | 0.048        | 0.049          | PTPRK, THEMIS, LAMA2, TMEM244, L3MBTL3           |
| 7   | 8892730   | rs6463848   |             | T             | 1.00 | 0.9689        | 0.398          | 0.399          | 0.386        | 0.404          | NXPH1, NDUFA4, PHF14, THSD7A                     |
| 9   | 22206559  | rs9696092   | CDKN2B      | C             | 0.97 | 0.7137        | 0.425          | 0.433          | 0.395        | 0.439          | MTAP, RP11-145E5.5, C9orf53, CDKN2A, CDKN2B      |
| 15  | 52868845  | rs184132620 | ARPP19      | C             | 1.85 | 0.1182        | 0.017          | 0.009          | 0.024        | 0.014          | ARPP19, FAM214A, LYSMD2, SCG3                    |
| 19  | 32610710  | rs17597505  |             | T             | 1.50 | <b>0.0383</b> | 0.066          | 0.045          | 0.076        | 0.061          | VSTM2B, POP4, C19orf12, CCNE1, URI1, ZNF536      |
| 20  | 61585706  | rs2093045   | SLC17A9     | C             | 0.95 | 0.5891        | 0.364          | 0.376          | 0.314        | 0.388          | DIDO1, GID8, SLC17A9, COL9A3, TCLF5, BHLHE23     |
